# Supplementary material for: High Preoperative Serum Syndecan-1, a Marker of Endothelial Glycocalyx Degradation, and Severe Acute Kidney Injury after Valvular Heart Surgery
Source: PubMed Central journal article supplement (PMC7356050; doi:10.3390/jcm9061803), 2020-06-10
Supplement: jcm-09-01803-s001.pdf [file jcm-09-01803-s001.pdf]

**Supplementary Table 1. Hematologic variables.**

|                                       | Low SDC-1<br>(N = 191) | High SDC-1<br>(N = 59) | <i>p</i> Value |
|---------------------------------------|------------------------|------------------------|----------------|
| Haematocrit (%)                       |                        |                        |                |
| Preoperative                          | 37.9 ± 5.4             | 36.5 ± 6.3             | 0.568          |
| Postoperative 6 h                     | 31.6 ± 4.8             | 30.4 ± 4.8             | 0.428          |
| Postoperative 24 h                    | 30.4 ± 4.6             | 28.9 ± 6.1             | 0.348          |
| Postoperative 48 h                    | 28.3 ± 4.0             | 27.7 ± 3.9             | >0.999         |
| Leukocyte count (/μL)                 |                        |                        |                |
| Preoperative                          | 6212 ± 1773            | 5228 ± 2061            | 0.004          |
| Postoperative 6 h                     | 11822 ± 4565           | 10711 ± 4445           | 0.408          |
| Postoperative 24 h                    | 12572 ± 3730           | 12169 ± 3650           | >0.999         |
| Postoperative 48 h                    | 11691 ± 3576           | 11362 ± 3352           | >0.999         |
| Platelet count (×10 <sup>3</sup> /μL) |                        |                        |                |
| Preoperative                          | 195 ± 63               | 178 ± 64               | 0.004          |
| Postoperative 6 h                     | 119 ± 35               | 117 ± 37               | 0.492          |
| Postoperative 24 h                    | 107 ± 37               | 101 ± 31               | 0.924          |
| Postoperative 48 h                    | 93 ± 33                | 89 ± 31                | >0.999         |

Note: Data are expressed as mean ± standard deviation or median (interquartile range). Abbreviation: SDC-1, syndecan-1.

**Supplementary Table 2. Hemodynamic variables.**

|                                         | Low SDC-1<br>(N = 159) | High SDC-1<br>(N = 91) | <i>p</i> Value |
|-----------------------------------------|------------------------|------------------------|----------------|
| Mean arterial pressure (mmHg)           |                        |                        |                |
| Post-induction                          | 84 ± 15                | 84 ± 16                | >0.999         |
| Post-CPB                                | 70 ± 10                | 68 ± 13                | 0.640          |
| Postoperative 6 h                       | 78 ± 10                | 76 ± 9                 | 0.320          |
| Postoperative 24 h                      | 81 ± 10                | 78 ± 9                 | 0.196          |
| Heart rate (bpm)                        |                        |                        |                |
| Post-induction                          | 69 ± 13                | 68 ± 13                | >0.999         |
| Post-CPB                                | 80 ± 10                | 82 ± 10                | >0.999         |
| Postoperative 6 h                       | 82 ± 10                | 84 ± 14                | >0.999         |
| Postoperative 24 h                      | 80 ± 10                | 85 ± 14                | 0.128          |
| Central venous pressure (mmHg)          |                        |                        |                |
| Post-induction                          | 10 ± 3                 | 11 ± 4                 | 0.068          |
| Post-CPB                                | 11 ± 3                 | 10 ± 2                 | 0.068          |
| Postoperative 6 h                       | 8 ± 3                  | 9 ± 3                  | 0.312          |
| Postoperative 24 h                      | 7 ± 3                  | 9 ± 3                  | 0.060          |
| Mean pulmonary arterial pressure (mmHg) |                        |                        |                |
| Post-induction                          | 21 ± 6                 | 23 ± 7                 | 0.472          |
| Post-CPB                                | 20 ± 3                 | 21 ± 3                 | >0.999         |
| Postoperative 6 h                       | 19 ± 5                 | 21 ± 4                 | 0.052          |
| Cardiac index (L/min/m <sup>2</sup> )   |                        |                        |                |
| Post-induction                          | 2.1 ± 0.5              | 2.2 ± 0.6              | >0.999         |
| Post-CPB                                | 2.6 ± 0.7              | 2.6 ± 0.6              | >0.999         |
| Postoperative 6 h                       | 2.9 ± 0.6              | 3.1 ± 0.7              | 0.234          |

Note: Data are expressed as mean ± standard deviation. Abbreviations: SDC-1, syndecan-1; CPB, cardiopulmonary bypass.

**Supplementary Table 3.** Correlations with the preoperative syndecan-1.

|                                     | <b>Spearman's <math>\rho</math></b> | <b>95% CI</b> | <b><i>p</i> Value</b> |
|-------------------------------------|-------------------------------------|---------------|-----------------------|
| Age (years)                         | -0.037                              | -0.160-0.088  | 0.567                 |
| Body surface area (m <sup>2</sup> ) | 0.018                               | -0.106-0.142  | 0.772                 |
| Left ventricular EF (%)             | -0.214                              | -0.330-0.091  | 0.001                 |
| LAVI (mL/m <sup>2</sup> )           | 0.267                               | 0.084-0.324   | 0.001                 |
| RVSP (mmHg)                         | 0.166                               | 0.042-0.285   | 0.008                 |
| Preoperative serum Cr (mg/dL)       | 0.121                               | -0.003-0.242  | 0.055                 |
| EuroSCORE                           | 0.050                               | -0.075-0.173  | 0.436                 |
| CPB time (min)                      | 0.249                               | 0.127-0.364   | 0.001                 |
| Preoperative TNF- $\alpha$ (pg/mL)  | 0.226                               | 0.103-0.342   | 0.001                 |
| Post-CPB TNF- $\alpha$ (pg/mL)      | 0.118                               | -0.006-0.239  | 0.062                 |
| Preoperative IL-6 (pg/mL)           | 0.195                               | 0.071-0.312   | 0.002                 |
| Post-CPB IL-6 (pg/mL)               | 0.257                               | 0.135-0.371   | 0.001                 |

Abbreviations: CI, confidence interval; EF, ejection fraction; LAVI, left atrial volume index; RVSP, right ventricular systolic pressure; Cr, creatinine; CPB, cardiopulmonary bypass; TNF- $\alpha$ , tumor necrosis factor- $\alpha$ ; IL-6, interleukin-6.
